# Supplementary material
Source: publisher figshare collection journal article supplement (https://karger.figshare.com/ndownloader/files/28850274)

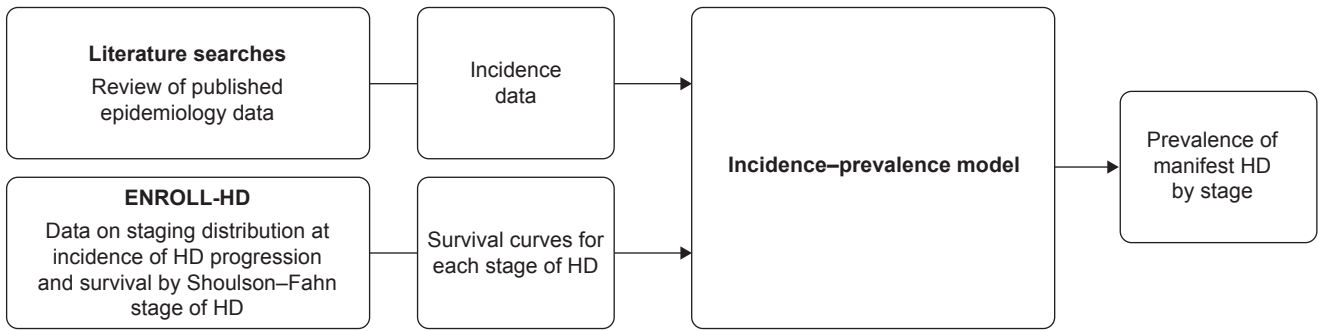

Supplement: Supplementary file 1 [file 28850274]
